# Supplementary material
Source: PubMed Central journal article supplement (PMC7082578)
Supplement: AEM.02904-19-s0001.pdf [file AEM.02904-19-s0001.pdf]

1 Table S1. The experimental correlation between the osmolality of the BG11 medium  
 2 and the concentrations of NaCl, KCl, MgCl<sub>2</sub>, NaNO<sub>3</sub>, sorbitol, mannitol and PEG6000  
 3 in the medium.

| Osmolality<br>(mmol/kg) | NaCl<br>(mM) | Sorbitol<br>(mM) | Mannitol<br>(mM) | PEG6000<br>(%) | KCl<br>(mM) | NaNO <sub>3</sub><br>(mM) |
|-------------------------|--------------|------------------|------------------|----------------|-------------|---------------------------|
| 131                     | 0            | 0                | 0                | 0              | 0           | 0                         |
| 211                     | 75           | 185              | 151              | 15             | 76          | 63                        |
| 342                     | 150          | 294              | 266              | 21.1           | 155         | 149                       |
| 602                     | 300          | 509              | 494              | 27.5           | 312         | 320                       |
| 862                     | 450          | 725              | 723              | 31.7           | 468         | 491                       |

4

5 Table S2. Primers used in this study.

| Primer    | Sequence <sup>a</sup> (5'-3')   |
|-----------|---------------------------------|
| 0808-F    | CGGGATCCGATGGCAGCTCAAATCTCTAC   |
| 0808-R    | AGCGGCCGCACTGAAAAGGTTAAGCGATCG  |
| 0397-F    | ATTGGATCCGATGCCCGATTCTGTTGTGCTG |
| 0397-R    | AAAGCGGCCGCTTAGGGTAAGCCCCGCAGA  |
| E356A-F   | ATCCGGCGCTGACCGCACCTTTTGGTTTG   |
| E356A-R   | GCGGTCAGCGCCGATTGACGAATACC      |
| E364A-F   | TTGGTTTGACAATTTTGGCGGCAGGAAGCTG |
| E364A-R   | GCCAAAATTGTCAAACCAAAGGTTCCGGTC  |
| D473A-F   | AACGCCTTGTCGTTAGTGCCATCGACAAC   |
| D473A-R   | GCACTAACGACAAGGCGTTTGGCATCAATC  |
| RT-sps-F  | CCTGTTGGAGAACAACACCGCGA         |
| RT-sps-R  | GGATTGTCGCCAGCACTCAGCAG         |
| RT-rnpB-F | CAACATCGAGAGGTGTTGGC            |
| RT-rnpB-R | CCACCTCTAGCGGTCCATAA            |

6 <sup>a</sup>Underlines represent restriction endonuclease sites used for DNA cloning.

7

8

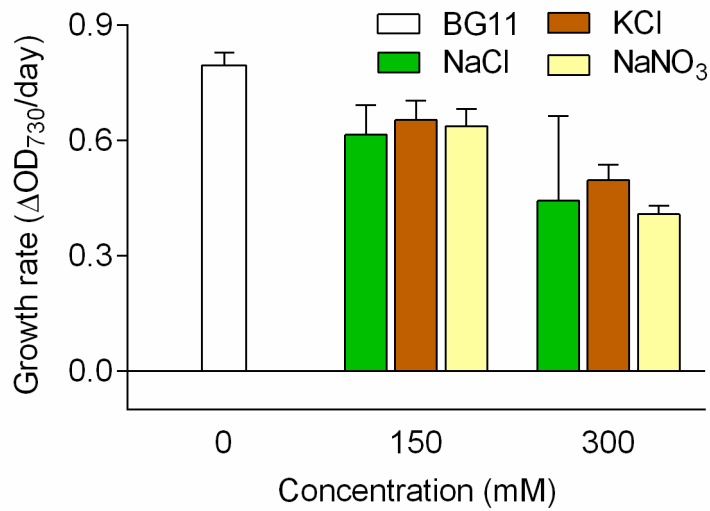

9

10 Figure S1. Growth rate of the wild type Syn7942 cultivated in the BG11 medium  
11 containing different concentrations of NaCl, KCl, and NaNO<sub>3</sub>. The OD<sub>730</sub> of  
12 cyanobacterial cells was monitored for 5 days. The data are presented as means from  
13 three independent replicates with standard deviations.

14

15

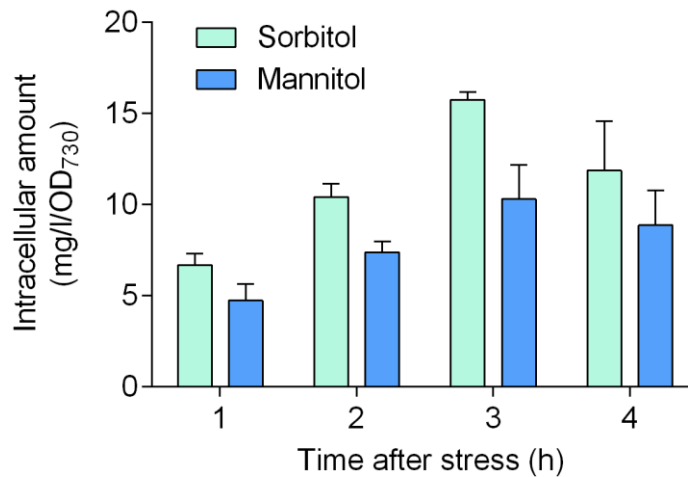

16

17 Figure S2. The amounts of sorbitol and mannitol in Syn7942 cells after applying  
18 sorbitol or mannitol stress of 602 mmol/kg. The data are presented as means from  
19 three independent replicates with standard deviations.
